# Supplementary material
Source: HighWire-hosted journal article supplement (http://ajnr-stage2.highwire.org/highwire/filestream/92030/field_highwire_adjunct_files/0/1722.pdf)
Supplement: 1722.pdf [file 1722.pdf]

## Supplemental Material

### Altered blood flow in the ophthalmic and internal carotid arteries in patients with age-related macular degeneration measured using non-contrast MR angiography at 7 Tesla

Matthew L. Hibert BS, Y. Iris Chen PhD, Ned Ohringer BA, William J. Feuer MS, Nadia K.

Waheed, MD MPH, Jeffrey S. Heier MD, Michael W. Calhoun BSE, Philip J. Rosenfeld MD

PhD, Jonathan R. Polimeni PhD

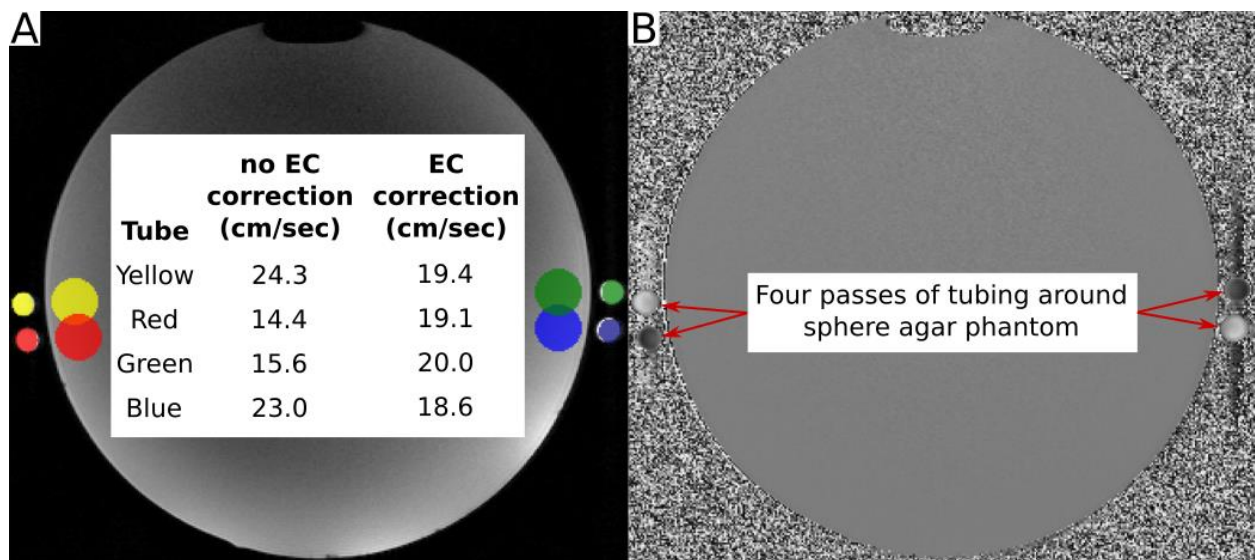

**Supplementary Figure 1:** A custom-built flow phantom, consisting of a spherical agar gel phantom wrapped with water-filled tubing making four passes around its center, with a continuous circuit of flowing water, used to confirm the quantitative flow rates from the PC-MRA data and to validate the EC correction process. (A) The smaller ROIs cover the inner diameter of each tube and the color-matched larger ROIs were used for EC correction. The table shows the flow velocities through each tube before and after EC correction when the flow phantom was set to output 20 cm/s. (B) A phase-valued image from a PC-MRA acquisition with a VENC of 45 cm/s in which the four tubes can be seen adjacent to the agar sphere phantom.
